# Supplementary material
Source: PubMed Central journal article supplement (PMC1179736)
Supplement: nar_33_13_4078__1.pdf [file nar_33_13_4078__1.pdf]

## Supplementary data

### 1. Nature and properties of Rfc1 C-terminal domain mutants

Two types of *rfc1* mutant were generated in this study: single amino acid substitutions created by PCR-based *in vitro* mutagenesis (*rfc1-33* – *rfc1-41*) and pentapeptide insertions (*rfc1-43* – *rfc1-54*, with the inserted amino acids shown in single letter code). The viable alleles marked with the asterisks displayed mild sensitivity to MMS and HU at 32°C.

| Mutant allele  | Mutant type  | Mutation            | Phenotype             |
|----------------|--------------|---------------------|-----------------------|
| <i>rfc1-33</i> | Substitution | Asp739 > Ala739     | Viable *              |
| <i>rfc1-34</i> | Substitution | Lys745 > Ala745     | Viable                |
| <i>rfc1-35</i> | Substitution | Arg748 > Ala748     | Viable                |
| <i>rfc1-36</i> | Substitution | Glu807 > Ala807     | Viable                |
| <i>rfc1-37</i> | Substitution | Asp808 > Ala808     | Viable                |
| <i>rfc1-38</i> | Substitution | Glu814 > Ala818     | Viable                |
| <i>rfc1-39</i> | Substitution | Lys834 > Ala834     | Viable                |
| <i>rfc1-40</i> | Substitution | Arg839 > Ala839     | Viable                |
| <i>rfc1-41</i> | Substitution | Asp842 > Ala842     | Viable                |
| <i>rfc1-43</i> | Insertion    | Ile753-QGVPL-Gln754 | Lethal                |
| <i>rfc1-44</i> | Insertion    | Ser811-IRGTP-Ile812 | Temperature-sensitive |
| <i>rfc1-45</i> | Insertion    | Ala601-VRGTP-Val602 | Viable                |
| <i>rfc1-46</i> | Insertion    | Gly852-SRGTP-Ser853 | Viable *              |
| <i>rfc1-47</i> | Insertion    | Lys677-HLGAP-Leu678 | Viable                |
| <i>rfc1-48</i> | Insertion    | Leu622-HGGVP-His623 | Viable                |
| <i>rfc1-49</i> | Insertion    | Lys638-LGVPQ-Leu639 | Viable *              |
| <i>rfc1-50</i> | Insertion    | Glu870-VGVPH-Val871 | Viable                |
| <i>rfc1-51</i> | Insertion    | Pro858-MKGYP-Met859 | Viable                |
| <i>rfc1-52</i> | Insertion    | Met880-LGVPL-Leu881 | Viable *              |
| <i>rfc1-53</i> | Insertion    | Tyr650-LMGVP-Leu651 | Viable *              |
| <i>rfc1-54</i> | Insertion    | Leu780-PVGVP-Pro781 | Temperature-sensitive |

## 2. Peptide coverage of Elg1-RLC components

The amino acids sequences of Elg1 and the four small RFC subunits are shown, with the peptides identified by mass spectrometry underlined. Note that peptides corresponding to the first four sequences underlined in Elg1 were only found when the upper Elg1 band was analysed, suggesting that the predominant purified form (marked by an asterisk in Figure 3B) is N-terminally degraded.

Elg1

MQIVGYLSAD SQSNPDLKSE NEAKEEKPIG RRHTMSPVPA TSENKYFGKS  
PLSGSRKPRR SRSLHKERSY MRKFFDMDME ESKDFENDQS LLVTLKVSTS  
LGQKIENILH PKLSNDTNST AFPPAKSSGE ASDTNILVEN INSQETVNSS  
PLVSELHYSN LADSPSNLRN TVTSMHPFFM SKSVKKNSEI KVVSEERGGT  
KPERLLDPLW PTPDSQSMLE YAGSIEPSVF WFPKKHLEEA ILEETSHLSF  
KEVLSSTAN MITPLAEKNK TEVLQVTPSK LHTFALES LC FSPAPFIQKV  
LSRLLPSDPN VEMPMIPQIL EKGLWVSKYA PSKTQDCCAF SQCLSKIADW  
LRSCRLTKPE SSSVPPSSSI SRSSTIHSCT SSKRNEDSLS ESDFEPDIIE  
EEDDSDEFNP SVSRKKAKLT SSQFSNWMLV TGVTGIGKTS CLYAICRELN  
FEVVEIHGPM RRSGKELLER IGELTQSHIV DKSRLNNTPD ILILLEEVDI  
LFQDDRGFWQ AVSTLIEKSK RPVVMTCNET DFLPSAFLQE DHIVQFQSI  
SALLTDYISS VLYADRCIIS RNVVESISYR YGSDLRGILM QLNFWSLVNF  
PSLPSKDKQD DSHEPFIEAT ISAFDEGVGV YNPRIQTS ED LLQTYSEEQ  
GDIGLLFMPN LVNWRKVCVP KSEMEEKEAI MEKLIYSHQY ADSLSYVDYR  
FSSOPTIYET YELMNSASF EDMSLECRDN CANAFQDNLV GFPTISNPFH  
ANAPPEPHEL KLOYHSFCFI NNLFSSKSSLK AISSNDSIVP KALNNRELQL  
SALASTIGYK LDPDDVYNIL SFLSFANSQV TSYTPPNSID RPNLILEV  
APFVRCMRRY DRIRLNSYKL LLSSKGRSAS HISRRGAASI LRSAGYNYGR  
LQYLEGSDRI LSTWFSSTLD

Rfc2

MSFFAPRNKK TEQEAKKSIP WVELYRPKTL DQVSSQESTV QVLKKTLLSN  
NLPHMLFYGS PGTGKTSTIL ALSRELFQP LMKSRVLELN ASDERGISII  
REKVKSFAKT TVTNKVDGYP CPPFKIILD EADSMTOAQ AALRRTMESY  
ARITRFCLIC NYMTRIIDPL SSRCSKYRFK PLDNENMVKR LEFIAADQAV

SMEPGVVNAL VECSGGDMRK AITFLQSAAN LHQGTPITIS SVEELAGAVP  
YNIIRSLTDT AYTKNVSNE TLSRDVAAEG YSTGIILSQL HDVLLKEETL  
SSPVKYKIFM KLSEVDKRLN DGADETLQLL DLLSSISVVC

Rfc3

MSIEKGKGRA MDIDLPLGSE STLPWVEKYR PANLEDVVSH KDIISTLEKF  
ISSNRVPHML FYGPPGTGKT STILACARKI YGPNYRNQLM ELNASDDRGI  
DAVREQIKNF ASTRQIFAST FKMIILDEAD AMTLAAQNAL RRVIEKYTKN  
VRFCIICNYI NKISPAIQSR CTRFRFQPLP PKEIEKTVDH VIQSEHCNID  
PDAKMAVLRL SKGDMRKALN ILQACHAAYD HIDVSAIYNC VGHPHPSDID  
YFLKSIMNDE FVIAFNTESS IKQQKGLALQ DILTCIFEAL DELEIKPNAK  
IFILDQLATI EHRMSFGCSE KIQLSAMIAS IKTGVDLAAK VN

Rfc4

MSNAVSSSVF GEKNNSVAYE LPWVEKYRPI VLDDIVGNEE TIDRLKVIK  
EGNMPHLVIS GMPGIGKTTS ILCLAHALLG PAYKEGVLEL NASDERGIDV  
VRNRIKAFAQ KKVILPPGRH KIILDEADS MTAGAQQALR RTMEIYSNTT  
RFALACNQSNI KIIPIQSRC AILRYSRLTD QOVLQRLNI CKAEKVNYTD  
DGLAALIMTA EGDMRQAVNN LQSTVAGFGL VNGENVFVA DQPSPVAIHA  
MLTACQSGNI DVALEKLQGI WDLGFSAVDI VTNMFRVVK MDSIPEFSRL  
EMLKEIGQTH MIILEGVQTL LQLSGLVCRL AKSQMKPESF II

Rfc5

MLWLDQYRPK TLASLDYHKQ LSERLISLSS TNEFPHELLVY GPSGAGKKTR  
VVAILRELYG PGSEKLIKIDQ RTFLTPSSKK LQINIVSSLH HLEITPSDVG  
NYDRVIMQEL LKDVAQSAQV DLQAKKIFKV VVINVADELRT RDAQAALRRT  
MEKYSNNIRL ILIANSTSKI IEPIRSRTLM VRVAAPTPEE IILVMSKILT  
AQGLEAPDSL LNNIANNCDR NLRKAILLE TVHAKSPGNK QLIDTGAQLP  
LPDWQTFIQQ VGDSMLQEQS PARILAVRSM LYDLLSHCIP PTTILKELLS  
FFLSKVDTKL HPYLIQAAAN YEHRTRMGNK SIFHLEAFVA YFMKVYAMLQ  
LGMELPSY
